# Supplementary material for: Enhanced pinocembrin production in Escherichia coli by regulating cinnamic acid metabolism
Source: Sci Rep. 2016 Sep 2;6:32640. doi: 10.1038/srep32640 (PMC5009306; doi:10.1038/srep32640)
Supplement: Supplementary Information [file srep32640-s1.pdf]

1    **Enhanced pinocembrin production in *Escherichia coli* by regulating cinnamic acid metabolism**

2    Weijia Cao <sup>1,2</sup>, Weichao Ma<sup>1,2,3</sup>, Xin wang<sup>1,2</sup>, Bowen Zhang<sup>1,2</sup>, Xun Cao<sup>1,2</sup>, Kequan Chen<sup>1,2\*</sup>, Yan Li<sup>1,2</sup>  
3    & Pingkai Ouyang<sup>1,2</sup>

4

5    <sup>1</sup>State Key Laboratory of Materials-Oriented Chemical Engineering, Nanjing 211816, P.R. China

6    <sup>2</sup>College of Biotechnology and Pharmaceutical Engineering, Nanjing Tech University, Nanjing 211816,  
7    P.R. China

8    <sup>3</sup>College of Bioengineering and Biotechnology, Tianshui Normal University, Tianshui 741001, P.R.  
9    China

10    \*Correspondence and requests for materials should be addressed to K.C. (kqchen@njtech.edu.cn )

11

**Construction of plasmids.** pET-YEPAL was constructed by amplifying *Rhodotorula mucilaginosa* PAL (YEPAL) from pET28a-4GS [30] using primers YEPAL-F (*Bam*HI) and YEPAL-R (*Sac*I) and cloning the resulting product into the *Bam*HI/*Sac*I sites of pETDuet-1. pET-YEPAL-SE4CL was constructed by amplifying *Streptomyces. coelicolor* A3 (2) 4CL (SE4CL) from pET28a-4GS using primers SE4CL-F (*Nde*I) and SE4CL-R (*Xho*I) and cloning the resulting product into the *Nde*I/*Xho*I sites of pET-YEPAL. pET-BOPAL was constructed by amplifying *Bambusa oldhamii* PAL (BOPAL) from pUC57-BOPAL (synthesized by GENEWIZ, Nanjing, China) using primers BOPAL-F (*Nco*I) and BOPAL-R (*Hind*III) and cloning the resulting product into the *Nco*I/*Hind*III sites of pETDuet-1. pET-BOPAL-SE4CL was constructed by cloning the SE4CL product into the *Nde*I/*Xho*I sites of pET-BOPAL. pET-YEPAL-PA4CL was constructed by amplifying *Petroselinum crispum* 4CL (PA4CL) from pUC57-PA4CL (synthesized by GENEWIZ, Nanjing, China) using primers PA4CL-F (*Nde*I) and PA4CL-R (*Xho*I) and cloning the resulting product into the *Nde*I/*Xho*I sites of pET-YEPAL. pET-BOPAL-PA4CL was constructed through the digestion of both pET-BOPAL-SE4CL and pET-YEPAL-PA4CL with *Nde*I and *Xho*I, followed by ligation of the appropriate fragments.

pET-CHS was constructed by amplifying *Glycyrrhiza uralensis* CHS from pET28a-4GS [30] using primers CHS-F (*Nco*I) and CHS-R (*Eco*RI) and cloning the resulting product into the *Nco*I/*Eco*RI sites of pETDuet-1. pUC-CHS was constructed through the digestion of both pET-CHS and pUC19 with *Bam*HI and *Eco*RI, followed by ligation of the appropriate fragments. pET-CHS-CHI was constructed by amplifying *Medicago sativa* CHI from pET28a-4GS using primers CHI-F (*Nde*I) and CHI-R (*Xho*I) and cloning the resulting product into the *Nde*I/*Xho*I sites of pET-CHS. pRSF-CHS-CHI was constructed through the digestion of both pET-CHS-CHI and pRSFDuet-1 with *Nco*I and *Xho*I, followed by ligation of the appropriate fragments.

34 pTrc-YEPAL was constructed by amplifying YEPAL from pET28a-4GS using primers YEPAL-F2  
35 (*SacI*) and YEPAL-R2 (*XbaI*) and cloning the resulting product into the *SacI/XbaI* sites of pTrc99a.  
36 pTrc-SE4CL was constructed by amplifying SE4CL from pET28a-4GS using primers SE4CL-F2  
37 (*BamHI*) and SE4CL-R2 (*HindIII*) and cloning the resulting product into the *BamHI/HindIII* sites of  
38 pTrc99a. pTrc-BOPAL was constructed by amplifying BOPAL from pUC57-BOPAL by using primers  
39 BOPAL-F (*NcoI*) and BOPAL-R (*HindIII*) and cloning the resulting product into the *NcoI/HindIII* sites  
40 of pTrc99a. pTrc-PA4CL was constructed by amplifying PA4CL from pUC57-PA4CL by using primers  
41 PA4CL-F2 (*EcoRI*) and PA4CL-R2 (*PstI*) and cloning the resulting product into the *EcoRI/PstI* sites of  
42 pTrc99a.

43 YEPAL-rrnB fragment was amplified from YEPAL to rrnB T1 terminator by using YEPAL-F2  
44 (*SacI*) and YEPAL-R3 (*BglII*). Trc-SE4CL-rrnB fragment was amplified from Trc promoter to rrnB T1  
45 terminator by using SE4CL-F3 (*BamHI*) and SEPAL-R3 (*XbaI*). Trc-BOPAL-rrnB fragment was  
46 amplified from BOPAL to rrnB T1 terminator using BOPAL-F (*NcoI*) and BOPAL-R2 (*BglII*).  
47 Trc-PA4CL-rrnB fragment was amplified from Trc promoter to rrnB T1 terminator using SE4CL-F3  
48 (*BamHI*) and SE4CL-R3 (*XbaI*). pTrc-YEPAL-SE4CL was constructed through the digestion of  
49 pTrc99a, Trc-YEPAL-rrnB and Trc-SE4CL-rrnB with *SacI/XbaI*, *SacI/BamHI*, and *BglII/XbaI*, followed  
50 by ligation of the appropriate fragments. pTrc-YEPAL-PA4CL, pTrc-BOPAL-SE4CL and  
51 pTrc-BOPAL-PA4CL were constructed as same as pTrc-YEPAL-SE4CL.

52 pACYC-Trc-BOPAL-Trc-PA4CL was constructed by through the digestion of both  
53 pTrc-BOPAL-PA4CL and pACYCDuet-1 with *NcoI* and *XhoI*, followed by ligation of the appropriate  
54 fragments. Fused-CHS-CHI was amplified by using Fused-F (*XbaI*) and Fused-R (*XbaI*).  
55 pTrc-BOPAL-PA4CL-CHS-CHI was constructed by in-fusion cloning of pTrc-BOPAL-PA4CL and

56 Fused-CHS-CHI.

57 pRSF-ACC was constructed by amplifying *accBC* and *ftsR1* from *C. glutamicum* using primers  
58 *accBC*-F (*EcoRV*), *accBC*-F (*KpnI*), *ftsR1*-F (*KpnI*) and *ftsR1*-R (*AvrII*) and then cloning the resulting  
59 product into the *EcoRV/AvrII* sites of pRSFDuet-1. pRSF-*acs*-ACC was constructed by amplifying *acs*  
60 from *E.coli* using primers *acs*-F (*BamHI*) and *acs*-F (*NotI*) and cloning the resulting product into the  
61 *BamHI/NotI* sites of pRSF-ACC.

62 pRSF-*acs*-ACC-CHS(S165M)-CHI was constructed by amplifying CHS(S165M)-CHI from  
63 pRSF-CHS(S165M)-CHI using primers Fused-F2 (*AvrII*) and Fused-R2 (*AvrII*) and cloning the  
64 resulting product into the *AvrII* sites of pRSF-*acs*-ACC.

65

66 **Supplementary Table**

67 Table S1 Strains used in this study

| Strains                                   | Description                                                                                                                                                  | Source or reference |
|-------------------------------------------|--------------------------------------------------------------------------------------------------------------------------------------------------------------|---------------------|
| <i>E. coli</i> BL21(DE3)                  | F <sup>-</sup> ompT hsdS <sub>B</sub> (r <sub>B</sub> <sup>-</sup> m <sub>B</sub> <sup>-</sup> ) gal (λ cI857 ind1 sam7 nin5 lacI lacUV5-T7 gene1), dcm(DE3) | Transgen            |
| <i>E. coli</i> Trans-T1                   | F <sup>-</sup> ϕ80 (lacZ) ΔM15 ΔlacX 74 hsdR(r <sub>k</sub> <sup>-</sup> m <sub>k</sub> <sup>-</sup> ) ΔrecA 1398endA1 tonA                                  | Transgen            |
| <i>E. coli</i> K-12                       | Wild-type strain, F <sup>+</sup> rpoS (AM) <i>rph</i> -1                                                                                                     | CGSC 4401           |
| <i>Corynebacterium glutamicum</i>         | Clone for ACC                                                                                                                                                | ATCC                |
| ATCC 13032                                |                                                                                                                                                              |                     |
| WT                                        | <i>E. coli</i> BL21(DE3) carrying pRSFDuet-1                                                                                                                 | This study          |
| Ser                                       | <i>E. coli</i> BL21(DE3) carrying pTrc-BOPAL-PA4CL and pRSF-CHS-CHI                                                                                          | This study          |
| ACC overexpression                        | <i>E. coli</i> BL21(DE3) carrying pRSF-ACC                                                                                                                   | This study          |
| <i>acs</i> and ACC overexpression         | <i>E. coli</i> BL21(DE3) carrying pRSF-acs-ACC                                                                                                               | This study          |
| FabF overexpression                       | <i>E. coli</i> BL21(DE3) carrying pACYC-FabF                                                                                                                 | [18]                |
| <i>acs</i> , ACC, and FabF overexpression | <i>E. coli</i> BL21(DE3) carrying pRSF-acs-ACC and pACYC-FabF                                                                                                | This study          |
| S165M, <i>acs</i> ↑, ACC↑, FabF↑          | <i>E. coli</i> BL21(DE3) carrying pTrc-BOPAL-PA4CL, pRSF-acs-ACC-CHS(S165M)-CHI and pACYC-FabF                                                               | This study          |

68 Table S2 Plasmids used in this study

| Plasmids        | Description                                                                                                                                                               | Source or reference |
|-----------------|---------------------------------------------------------------------------------------------------------------------------------------------------------------------------|---------------------|
| pET-28a         | T7 promoter, pBR322 ori, , Km <sup>R</sup>                                                                                                                                | Novagen             |
| pETDuet-1       | Double T7 promoters, pBR322 ori, Amp <sup>R</sup>                                                                                                                         | Novagen             |
| pACYCDuet-1     | Double T7 promoters, P15A ori, Cm <sup>R</sup>                                                                                                                            | Novagen             |
| pRSFDuet-1      | Double T7 promoters, RSF ori, Kn <sup>R</sup>                                                                                                                             | Novagen             |
| pUC19           | pBR322 ori, Amp <sup>R</sup>                                                                                                                                              | Lab collection      |
| pTrc99a         | Trc promoter, pBR322 ori, , Amp <sup>R</sup>                                                                                                                              | Lab collection      |
| pET28a-4GS      | pET-28a carrying <i>pal</i> from <i>R. mucilaginosa</i> , <i>4cl</i> from <i>S. coelicolor</i> , <i>chs</i> from <i>G. uralensis</i> and <i>chi</i> from <i>M. sativa</i> | [30]                |
| pET-YEPAL-SE4CL | pETDuet-1 carrying <i>pal</i> from <i>R. mucilaginosa</i> , <i>4cl</i> from <i>S. coelicolor</i>                                                                          | This study          |
| pET-YEPAL-PA4CL | pETDuet-1 carrying <i>pal</i> from <i>R. mucilaginosa</i> , <i>4cl</i> from <i>P. crispum</i>                                                                             | This study          |
| pET-BOPAL-SE4CL | pETDuet-1 carrying <i>pal</i> from <i>B. oldhamii</i> , <i>4cl</i> from <i>S. coelicolor</i>                                                                              | This study          |
| pET-BOPAL-PA4CL | pETDuet-1 carrying <i>pal</i> from <i>B. oldhamii</i> , <i>4cl</i> from <i>P. crispum</i>                                                                                 | This study          |
| pTrc-YEPAL      | pTrc99a carrying <i>pal</i> from <i>R. mucilaginosa</i>                                                                                                                   | This study          |
| pTrc-SE4CL      | pTrc99a carrying <i>4cl</i> from <i>S. coelicolor</i>                                                                                                                     | This study          |
| pTrc-BOPAL      | pTrc99a carrying <i>pal</i> from <i>B. oldhamii</i>                                                                                                                       | This study          |

---

|                           |                                                                                                                                                                    |            |
|---------------------------|--------------------------------------------------------------------------------------------------------------------------------------------------------------------|------------|
| pTrc-PA4CL                | pTrc99a carrying <i>4cl</i> from <i>P. crispum</i>                                                                                                                 | This study |
| pTrc-YEPAL-SE4CL          | pTrc99a carrying <i>pal</i> from <i>R. mucilaginosa</i> , <i>4cl</i> from <i>S. coelicolor</i>                                                                     | This study |
| pTrc-YEPAL-PA4CL          | pTrc99a carrying <i>pal</i> from <i>R. mucilaginosa</i> , <i>4cl</i> from <i>P. crispum</i>                                                                        | This study |
| pTrc-BOPAL-SE4CL          | pTrc99a carrying <i>pal</i> from <i>B. oldhamii</i> , <i>4cl</i> from <i>S. coelicolor</i>                                                                         | This study |
| pTrc-BOPAL-PA4CL          | pTrc99a carrying <i>pal</i> from <i>B. oldhamii</i> , <i>4cl</i> from <i>P. crispum</i>                                                                            | This study |
| pTrc-BOPAL-PA4CL-CHS-CHI  | pTrc99a carrying <i>pal</i> from <i>B. oldhamii</i> , <i>4cl</i> from <i>P. crispum</i> , <i>chs</i> from <i>G. uralensis</i> and <i>chi</i> from <i>M. sativa</i> | This study |
| pACYC-Trc-BOPAL-Trc-PA4CL | pACYCDuet-1 carrying <i>pal</i> from <i>B. oldhamii</i> , <i>4cl</i> from <i>P. crispum</i> under Trc promoter                                                     | This study |
| pET-CHS                   | pETDuet-1 carrying <i>chs</i> from <i>G. uralensis</i>                                                                                                             | This study |
| pUC-CHS                   | pUC19 carrying <i>chs</i> from <i>G. uralensis</i>                                                                                                                 | This study |
| pET-CHS-CHI               | pETDuet-1 carrying <i>chs</i> from <i>G. uralensis</i> and <i>chi</i> from <i>M. sativa</i>                                                                        | This study |
| pRSF-CHS-CHI              | pRSFDuet-1 carrying <i>chs</i> from <i>G. uralensis</i> and <i>chi</i> from <i>M. sativa</i>                                                                       | This study |
| pRSF-ACC                  | pRSFDuet-1 carrying <i>C. glutamicum accBC</i> and <i>dtsRI</i>                                                                                                    | This study |

---

---

|                                      |                                                                                                                                                                                       |            |
|--------------------------------------|---------------------------------------------------------------------------------------------------------------------------------------------------------------------------------------|------------|
| pRSF- <i>acs</i> -ACC                | pRSFDuet-1 carrying <i>E. coli</i> <i>acs</i> and <i>C. glutamicum</i> <i>accBC</i> and <i>dtsRI</i>                                                                                  | This study |
| pRSF- <i>acs</i> -ACC-CHS(S165M)-CHI | pRSFDuet-1 carrying <i>E. coli</i> <i>acs</i> , <i>C. glutamicum</i> <i>accBC</i> and <i>dtsRI</i> , <i>chs</i> (S165M) from <i>G. uralensis</i> and <i>chi</i> from <i>M. sativa</i> | This study |

---

69

70

71 Table S3 Primers used in this study

| Oligonucleotides           | Sequences, 5'-3'*                             |
|----------------------------|-----------------------------------------------|
| <i>YEPAL</i> -F (BamHI)    | CGC <u>GGATCC</u> GATGGCTCCGTCTGTTG           |
| <i>YEPAL</i> -R (SacI)     | C <u>GAGCTC</u> TTAAGCCATCATTTTAACCAGAACC     |
| <i>SE4CL</i> -F (NdeI)     | GGAATTCC <u>CATATG</u> TTCCGTTCTGAATACGCTGAC  |
| <i>SE4CL</i> -R (XhoI)     | CCG <u>CTCGAG</u> TAACGCGGTTACGCAGCTG         |
| <i>BOPAL</i> -F (NcoI)     | CATG <u>CCATGG</u> GCATGCCACGCGAGGATG         |
| <i>BOPAL</i> -R (HindIII)  | CCC <u>AAGCTT</u> TTAGCAAATCGGCAGCGG          |
| <i>PA4CL</i> -F (NdeI)     | GGAATTCC <u>CATATG</u> GGTGACTGCGTTGCTCC      |
| <i>PA4CL</i> -R (XhoI)     | CCG <u>CTCGAG</u> TTATTTCCGGCAGGTCACCAG       |
| <i>CHS</i> -F (NcoI)       | CATG <u>CCATGG</u> TTTCTGTTGCTGAAATCC         |
| <i>CHS</i> -R (EcoRI)      | CG <u>GAATTC</u> TTAGATAGCAACAGAGTGCAG        |
| <i>CHI</i> -F (NdeI)       | GGGAATTCC <u>CATATG</u> GCTGCTTCTATCACCG      |
| <i>CHI</i> -R (XhoI)       | CCG <u>CTCGAG</u> TTAGTTACCGATTTTGAAAGCACC    |
| <i>YEPAL</i> -F2 (SacI)    | C <u>GAGCTC</u> ATGGCTCCGTCTGTTGACTC          |
| <i>YEPAL</i> -R2 (XbaI)    | CTAG <u>TCTAGA</u> TTAAGCCATCATTTTAACCAGAACCG |
| <i>SE4CL</i> -F2 (BamHI)   | CGC <u>GGATCC</u> ATGTTCCGTTCTGAATACGC        |
| <i>SE4CL</i> -R2 (HindIII) | CCC <u>AAGCTT</u> TTAACGCGGTTACGCAG           |
| <i>PA4CL</i> -F2 (EcoRI)   | CCG <u>GAATTC</u> ATGGGTGACTGCGTTGCTCC        |
| <i>PA4CL</i> -R2 (PstI)    | AAA <u>ACTG</u> CAGTTATTTCCGGCAGGTCACCAGAAGC  |
| <i>YEPAL</i> -R3 (BglII)   | GGA <u>AGATCT</u> ATTTGTCCTACTCAGGAGAGCGTTC   |
| <i>SE4CL</i> -F3 (BamHI)   | CGC <u>GGATCC</u> TTGACAATTAATCATCCGGCTCG     |

---

|                           |                                                                  |
|---------------------------|------------------------------------------------------------------|
| <i>SEPAL</i> -R3 (XbaI)   | CTAG <b><u>TCTAGA</u></b> ATTTGTCCTACTCAGGAGAGCGTTC              |
| <i>BOPAL</i> -R2 (BglII)  | GGA <b><u>AGATCT</u></b> ATTTGTCCTACTCAGGAGAGCGTTC               |
| Fused-F (XbaI)            | CTGAGTAGGACAAAT <b><u>TCTAGA</u></b> GGATCTCGACGCTCTCCCTTATGC    |
| Fused-R (XbaI)            | TGCCTGCAGGTCGACT <b><u>TCTAGA</u></b> GACCGTGTGCTTCTCAAATGCCTGAG |
| <i>accBC</i> -F (EcoRV)   | GGCC <b><u>GATATC</u></b> GGGTGTCAGTCGAGACTAGGAAGATCAC           |
| <i>accBC</i> -F (KpnI)    | CGG <b><u>GGTACC</u></b> CCTTGATCTCGAGGAGAACAACG                 |
| <i>dtsR1</i> -F (KpnI)    | CGG <b><u>GGTACC</u></b> ATGACCATTTCTCACCTTT                     |
| <i>dtsR1</i> -R (AvrII)   | CGG <b><u>CCTAGG</u></b> TTACAGTGGCATGTTGCC                      |
| <i>acs</i> -F (BamHI)     | CG <b><u>GGATCC</u></b> GATGAGCCAAATTCACAAACACAC                 |
| <i>acs</i> -F (NotI)      | AAGGAAAAA <b><u>GCGGCCGCT</u></b> TACGATGGCATCGCGATAG            |
| Fused-F2 ( <i>AvrII</i> ) | CGGCAACATGCCACTGTAA <b><u>CCTAGG</u></b> CGACTCCTGCATTAGG        |
| Fused-R2 ( <i>AvrII</i> ) | CAGCGGTGGCAGCAG <b><u>CCTAGG</u></b> CAGCAGCGGTTTCTTTACCAG       |

---

72 \*Bold and underlined letters are restriction enzyme cut sites.

73

74 Table S4 mutant-specific primers in this study

| Oligonucleotides | Sequences, 5'-3'                     |
|------------------|--------------------------------------|
| Phe-F            | GAACGGTACCACCAGCGAAGCAACCCTGCTGGTAC  |
| Phe-R            | TCGCTGGTGGTACCGTTCTGCGTCTGGCTAAAGAC  |
| Asp-F            | GAACGGTACCACCAGCATCGCAACCCTGCTGGTAC  |
| Asp-R            | GATGCTGGTGGTACCGTTCTGCGTCTGGCTAAAG   |
| Lys-F            | GAACGGTACCACCAGCTTTGCAACCCTGCTGGTAC  |
| Lys-R            | AAAGCTGGTGGTACCGTTCTGCGTCTGGCTAAAG   |
| Ala-F            | GAACGGTACCACCAGCTGCGCAACCCTGCTGGTAC  |
| Ala-R            | GCAGCTGGTGGTACCGTTCTGCGTCTGGCTAAAGAC |
| Val-F            | GAACGGTACCACCAGCAACGCAACCCTGCTGGTAC  |
| Val-R            | GTTGCTGGTGGTACCGTTCTGCGTCTGGCTAAAGAC |
| Leu-F            | GAACGGTACCACCAGCCAGGCAACCCTGCTGGTAC  |
| Leu-R            | CTGGCTGGTGGTACCGTTCTGCGTCTGGCTAAAGAC |
| Pro-F            | GAACGGTACCACCAGCCGGGCAACCCTGCTGGTAC  |
| Pro-R            | CCGGCTGGTGGTACCGTTCTGCGTCTGGCTAAAGAC |
| Trp-F            | GAACGGTACCACCAGCCCAGCAACCCTGCTGGTAC  |
| Trp-R            | TGGGCTGGTGGTACCGTTCTGCGTCTGGCTAAAGAC |
| Met-F            | GAACGGTACCACCAGCCATGCAACCCTGCTGGTAC  |
| Met-R            | ATGGCTGGTGGTACCGTTCTGCGTCTGGCTAAAGAC |
| Ile-F            | GAACGGTACCACCAGCAATGCAACCCTGCTGGTAC  |
| Ile-R            | ATTGCTGGTGGTACCGTTCTGCGTCTGGCTAAAGAC |

75      **Supplementary Figure**

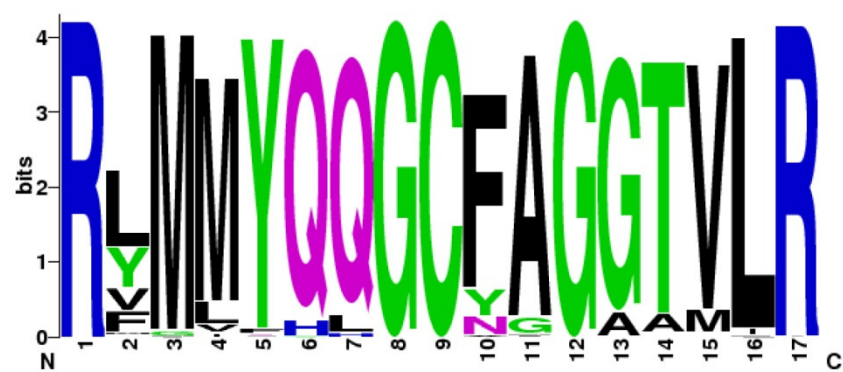

76

77      Fig. S1    The sequence logo of chalcone and stilbene synthases by PROSITE. 9<sup>th</sup> C: the active site  
78      residue.

79

80

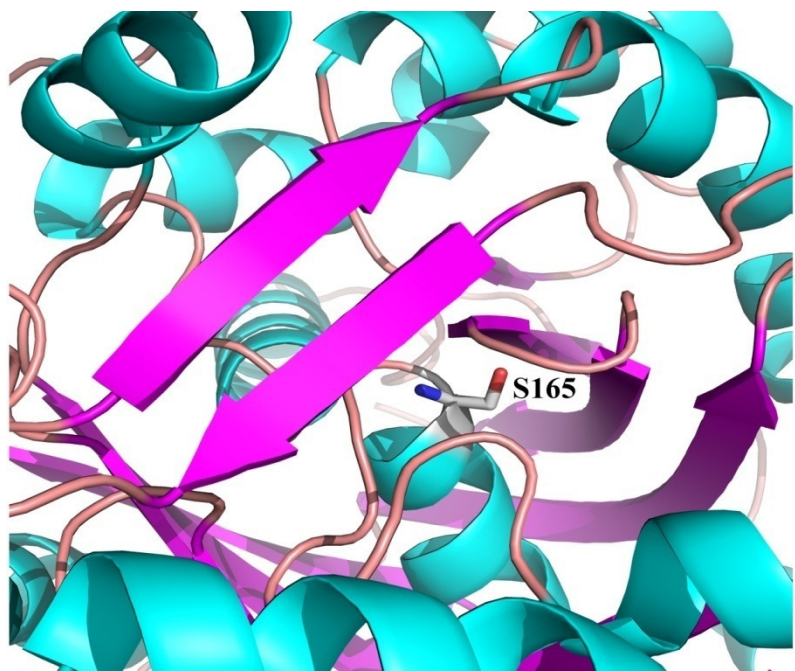

81

82      Fig. S2    A structure mode of *G. uralensis* CHS by SWISS-MODEL. S165: the mutation site

83

84
